# Supplementary material
Source: Elsevier journal article supplement (https://air.unimi.it/retrieve/handle/2434/511820/906761/mmc1.pdf)
Supplement: mmc1 [file mmc1.pdf]

## Supplementary material

**Table S1:** Compositions and chemical traits (expressed as % of DM) of the TMR for dry-cows and lactating cows of the 4 herds

| Component              | Herd     |                |          |                |          |                |          |                |
|------------------------|----------|----------------|----------|----------------|----------|----------------|----------|----------------|
|                        | A        |                | B        |                | C        |                | D        |                |
|                        | Dry-cows | Lactating cows | Dry-cows | Lactating cows | Dry-cows | Lactating cows | Dry-cows | Lactating cows |
| Ingredient, % of DM    |          |                |          |                |          |                |          |                |
| Grass hay              | -        | -              | 63.8     | 7.8            | 56.9     | 7.7            | 15.2     | 15.6           |
| Alfalfa hay silage     | -        | -              | -        | 4.6            | -        | 4.7            | -        | -              |
| Corn silage            | 23.7     | 34.5           | 28.2     | 30.9           | -        | 23.7           | -        | 30.5           |
| Grass silage           | -        | -              | -        | -              | -        | 5.0            | 39.3     | 4.6            |
| Wheat straw            | 40.5     | 7.1            | -        | -              | 20.3     | 1.9            | 22.8     | -              |
| Ground shelled corn    | 11.2     | 17.6           | -        | 26.1           | -        | 28.3           | -        | -              |
| Soybean meal           | 4.6      | 7.5            | 8.0      | 9.0            | -        | -              | -        | -              |
| Corn grain             | -        | -              | -        | -              | -        | 8.5            | -        | -              |
| Soybean seed           | -        | -              | -        | 5.7            | -        | -              | -        | -              |
| Commercial concentrate | 13.5     | 21.8           | -        | -              | 22.8     | 20.2           | 22.7     | 49.3           |
| Flax pannell           | -        | -              | -        | 3.8            | -        | -              | -        | -              |
| Hydrogenated fat       | -        | -              | -        | 1.3            | -        | -              | -        | -              |
| Molasses               | 2.5      | 4.1            | -        | 3.3            | -        | -              | -        | -              |
| Corn meal              | 4.0      | 7.4            | -        | 7.5            | -        | -              | -        | -              |
| Chemical, % of DM      |          |                |          |                |          |                |          |                |
| CP                     | 10.9     | 15.7           | 14.3     | 16.0           | 12.8     | 15.8           | 11.5     | 17.4           |
| Lipid                  | 3.1      | 3.9            | 2.8      | 5.6            | 2.5      | 3.3            | 2.2      | 3.1            |
| NDF                    | 49.7     | 32.3           | 52.8     | 28.0           | 58.2     | 34.0           | 56.4     | 34.6           |
| NDFf                   | 44.7     | 24.0           | 51.5     | 21.2           | 55.1     | 24.4           | 53.3     | 26.4           |
| ADF                    | 32.8     | 18.7           | 28.0     | 15.1           | 34.1     | 18.9           | 37.1     | 17.6           |
| Starch+sugar           | 21.2     | 35.4           | 10.9     | 37.8           | 7.9      | 31.1           | 8.1      | 31.2           |
| NEI (Mcal/kg DM)       | 1.39     | 1.65           | 1.29     | 1.62           | 1.17     | 1.66           | 1.22     | 1.68           |

Note: NDF = Neutral detergent fiber; NDFf = NDF from forage; ADF = Acid detergent fiber; NEI = Net energy lactation

**Table S2:** Descriptive statistics of hematological reference intervals (RIs) for cows at  $3 \pm 1$  DIM. Number of observations, mean, standard deviation, median, minimum, maximum, RI, number of outliers, confidence intervals (CI) of the lower (LRL) and upper reference limits (URL) and distribution of data. All RIs were generated according to a nonparametric method.

| Analyte      | Unit        | n   | Mean  | SD   | Median | Min  | Max   | RI         | Outliers | LRL 90% CI | URL 90% CI | Distribution |
|--------------|-------------|-----|-------|------|--------|------|-------|------------|----------|------------|------------|--------------|
| Erythrocytes | $10^{12}/L$ | 126 | 6.7   | 0.7  | 6.7    | 4.8  | 8.5   | 5.3-8.3    | 2S       | 4.8-5.7    | 7.8-8.5    | G            |
| Hemoglobin   | g/L         | 126 | 114.7 | 11.0 | 114.5  | 87.0 | 141.0 | 93.3-137.8 | 0        | 87-96      | 133-141    | G            |
| Hematocrit   | L/L         | 126 | 0.31  | 0.03 | 0.31   | 0.24 | 0.39  | 0.25-0.38  | 1S       | 0.24-0.27  | 0.37-0.39  | G            |
| MCV          | $\mu m^3$   | 126 | 47.0  | 3.1  | 46.6   | 39.9 | 54.8  | 40.1-53.2  | 0        | 39.9-42.4  | 52.9-54.8  | G            |
| MCH          | pg/cell     | 126 | 17.1  | 1.3  | 17.2   | 12.7 | 19.9  | 13.7-19.5  | 3S       | 12.7-14.7  | 19.3-19.9  | G            |
| MCHC         | g/L         | 126 | 35.2  | 1.2  | 35.0   | 29.6 | 38.2  | 32.8-37.4  | 2S       | 29.6-33.6  | 37.1-38.2  | NG           |
| RDW          | %           | 125 | 16.7  | 1.2  | 16.7   | 13.7 | 20.1  | 14.1-19.7  | 3S, 1R   | 13.7-15.1  | 18.9-20.1  | NG           |
| Leukocytes   | $10^9/L$    | 126 | 9.4   | 2.6  | 9.4    | 3.4  | 17.1  | 4.7-13.9   | 0        | 3.4-5.4    | 13.2-17.1  | G            |
| Neutrophils  | $10^9/L$    | 126 | 7.3   | 2.7  | 7.3    | 2.0  | 13.3  | 2.6-12.7   | 0        | 2.0-3.2    | 11.7-13.3  | G            |
| Lymphocytes  | $10^9/L$    | 126 | 8.4   | 2.7  | 8.4    | 2.6  | 15.3  | 3.9-13.8   | 0        | 2.6-4.6    | 12.5-15.3  | G            |
| Monocytes    | $10^9/L$    | 125 | 1.0   | 0.7  | 0.9    | 0.0  | 3.4   | 0.0-2.8    | 1S, 1R   | 0.0-0.0    | 2.1-3.4    | NG           |
| Eosinophils  | $10^9/L$    | 125 | 0.3   | 0.4  | 0.2    | 0.0  | 1.8   | 0.0-1.6    | 1S, 1R   | 0.0-0.0    | 1.1-1.8    | NG           |
| Platelets    | $10^9/L$    | 125 | 339   | 87   | 337    | 40   | 550   | 189-510    | 1S, 1R   | 40-218     | 474-550    | G            |

MCV: mean corpuscular volume; MCH: mean cellular hemoglobin; MCHC: mean corpuscular hemoglobin concentration; RDW: red cell distribution width; S: suspected outliers; R: removed outliers; G: Gaussian distribution of data; NG: non-gaussian distribution of data.

**Table S3:** Descriptive statistics of biochemical reference intervals (RIs) for cows at  $3 \pm 1$  DIM. Number of observations, mean, standard deviation, median, minimum, maximum, RI, number of outliers, confidence intervals (CI) of the lower (LRL) and upper reference limits (URL) and distribution of data. All RIs were generated according to a nonparametric method.

| Analyte                  | Unit        | n   | Mean  | SD   | Median | Min   | Max   | RI         | Outliers | LRL 90% CI  | URL 90% CI  | Distribution |
|--------------------------|-------------|-----|-------|------|--------|-------|-------|------------|----------|-------------|-------------|--------------|
| A/G-COL                  | ratio       | 130 | 1.14  | 0.28 | 1.05   | 0.53  | 2.13  | 0.71-1.9   | 7S, 3R   | 0.53-0.83   | 1.68-2.13   | NG           |
| Albumin-COL              | g/L         | 130 | 34.6  | 2.4  | 34.8   | 28.3  | 40.2  | 29.2-39.5  | 1S       | 28.3-29.8   | 39-40.2     | G            |
| ALP                      | U/L         | 131 | 69    | 28   | 64     | 17    | 166   | 26-145     | 1S       | 17-35       | 121-166     | NG           |
| AST                      | U/L         | 129 | 86.7  | 20.4 | 82.0   | 52.0  | 164.0 | 58.8-150.5 | 5S, 2R   | 52.0-62.0   | 127.0-164.0 | NG           |
| $\beta$ -hydroxybutyrate | mmol/L      | 129 | 0.75  | 0.31 | 0.71   | 0.31  | 1.76  | 0.38-1.71  | 7S, 2R   | 0.31-0.40   | 1.44-1.76   | NG           |
| Calcium                  | mmol/L      | 131 | 2.09  | 0.23 | 2.10   | 1.20  | 2.84  | 1.60-2.54  | 3S, 1R   | 1.20-1.70   | 2.40-2.84   | NG           |
| Chloride                 | mmol/L      | 129 | 95.9  | 3.7  | 96.0   | 85.0  | 104.0 | 87.0-102.8 | 5S, 2R   | 85-88       | 102-104     | NG           |
| Cholesterol              | mmol/L      | 130 | 2.16  | 0.51 | 2.14   | 1.25  | 3.95  | 1.35-3.34  | 6S, 1R   | 1.25-1.38   | 3.22-3.95   | NG           |
| Creatinine               | $\mu$ mol/L | 130 | 96.7  | 14.3 | 97.2   | 70.7  | 132.6 | 70.7-130.2 | 3S, 1R   | 70.7-70.7   | 123.8-132.6 | NG           |
| Fructosamine             | $\mu$ mol/L | 131 | 182   | 22   | 179    | 119   | 244   | 135-228    | 3S       | 119-144     | 217-244     | G            |
| GGT                      | U/L         | 128 | 20.5  | 6.5  | 19.0   | 7.0   | 47.0  | 12.0-36.8  | 3S, 3R   | 7.0-12.0    | 33.0-47.0   | NG           |
| Globulin-COL             | g/L         | 130 | 31.4  | 7.6  | 32.6   | 9.9   | 62.1  | 16.2-44.8  | 0        | 9.9-18.6    | 42-62.1     | NG           |
| Glucose                  | mmol/L      | 131 | 3.81  | 0.53 | 3.85   | 1.90  | 5.74  | 2.85-4.81  | 0        | 1.90-2.97   | 4.68-5.74   | G            |
| Magnesium                | mmol/L      | 129 | 0.89  | 0.16 | 0.91   | 0.53  | 1.32  | 0.62-1.25  | 1S, 2R   | 0.53-0.62   | 1.11-1.32   | G            |
| NEFA                     | mmol/L      | 131 | 0.66  | 0.38 | 0.55   | 0.11  | 1.96  | 0.16-1.63  | 0        | 0.11-0.20   | 1.43-1.96   | NG           |
| Phosphorous              | mmol/L      | 131 | 1.37  | 0.33 | 1.32   | 0.71  | 2.39  | 0.82-2.02  | 1S       | 0.71-0.90   | 1.97-2.39   | NG           |
| Potassium                | mmol/L      | 131 | 3.7   | 0.5  | 3.6    | 2.5   | 5.0   | 2.7-4.7    | 0        | 2.5-2.9     | 4.6-5.0     | NG           |
| Sodium                   | mmol/L      | 128 | 137.7 | 4.1  | 139.0  | 125.0 | 146.0 | 126-144    | 6S, 3R   | 125.0-130.0 | 146.0-149.0 | NG           |
| Total bilirubin          | $\mu$ mol/L | 130 | 6.57  | 4.43 | 5.48   | 0.29  | 21.99 | 1.03-19.45 | 6S, 1R   | 0.29-1.86   | 15.57-21.99 | NG           |
| Total protein            | g/L         | 131 | 67.4  | 8.4  | 68.0   | 46.0  | 97.0  | 48.3-83.4  | 1S       | 46.0-52.0   | 79.0-97.0   | NG           |
| Urea                     | mmol/L      | 131 | 2.91  | 0.75 | 2.83   | 1.50  | 5.00  | 1.67-4.45  | 0        | 1.50-1.83   | 4.16-5.00   | NG           |
| Zinc                     | $\mu$ mol/L | 131 | 10.60 | 3.64 | 10.86  | 1.07  | 19.28 | 2.79-17.30 | 0        | 1.07-5.20   | 16.52-19.28 | G            |

A/G: albumin:globulin ratio; COL: colorimetric method; ALP: alkaline phosphatase; AST: aspartate aminotransferase; GGT:  $\gamma$ -glutamyl transferase; NEFA: non-esterified fatty acid; S: suspected outliers; R: removed outliers; G: Gaussian distribution of data; NG: non-gaussian distribution of data.

**Table S4:** Descriptive statistics of reference intervals (RIs) for some markers of inflammation/oxidation and for serum protein electrophoresis (SPE) for cows at  $3 \pm 1$  DIM. Number of observations, mean, standard deviation, median, minimum, maximum, RI, number of outliers, confidence intervals (CI) of the lower (LRL) and upper reference limits (URL) and distribution of data. All RIs were generated according to a nonparametric method.

| Analyte                         | Unit              | n   | Mean  | SD    | Median | Min  | Max   | RI         | Outliers | LRL 90% CI | URL 90% CI  | Distribution |
|---------------------------------|-------------------|-----|-------|-------|--------|------|-------|------------|----------|------------|-------------|--------------|
| $\beta$ -carotene               | $\mu\text{mol/L}$ | 130 | 18.63 | 11.18 | 16.77  | 3.73 | 50.30 | 5.59-44.71 | 1R       | 3.73-7.45  | 40.99-50.30 | NG           |
| Ceruloplasmin                   | $\mu\text{mol/L}$ | 131 | 3.65  | 0.67  | 3.69   | 2.24 | 5.04  | 2.35-4.98  | 0        | 2.24-2.53  | 4.88-5.04   | G            |
| dROMs( $\text{H}_2\text{O}_2$ ) | mg/dL             | 131 | 15.3  | 3.9   | 14.5   | 7.7  | 25.9  | 9.4-24.2   | 1S       | 7.7-10.0   | 22.5-25.9   | NG           |
| Haptoglobin                     | $\mu\text{mol/L}$ | 131 | 8.5   | 5.4   | 7.8    | 0.1  | 23.6  | 0.8-21.8   | 2S       | 0.1-1.1    | 19.9-23.6   | NG           |
| Myeloperoxidase                 | U/L               | 131 | 476   | 99    | 469    | 237  | 808   | 262-742    | 3S       | 239-339    | 637-808     | G            |
| Paraoxonase-1                   | U/L               | 131 | 84.1  | 21.4  | 84.0   | 39.4 | 142.5 | 46.3-135   | 1S       | 39.4-53.6  | 128.4-142.5 | G            |
| Thiol groups                    | $\mu\text{mol/L}$ | 131 | 354   | 68    | 352    | 190  | 563   | 226-522    | 4S       | 190-244    | 474-563     | G            |
| Vitamin A                       | $\mu\text{mol/L}$ | 130 | 1.28  | 0.47  | 1.21   | 0.35 | 3.07  | 0.58-2.37  | 2S, 1R   | 0.35-0.59  | 2.17-3.07   | NG           |
| Vitamin E                       | $\mu\text{mol/L}$ | 130 | 3.51  | 1.88  | 3.18   | 0.46 | 10.17 | 0.84-9.10  | 5S, 1R   | 0.46-1.07  | 7.17-10.17  | NG           |
| Albumin-SPE                     | g/L               | 44  | 37.2  | 8.3   | 37.2   | 14.7 | 52.5  | 15.3-52.3  | 1S       | 14.7-25.1  | 48.7-52.5   | G            |
| Globulin-SPE                    | g/L               | 44  | 33.3  | 10.0  | 32.3   | 19.3 | 58.5  | 19.3-57.6  | 0        | 19.3-20.8  | 49.6-58.5   | G            |
| A/G-SPE                         | ratio             | 44  | 1.26  | 0.55  | 1.17   | 0.29 | 2.31  | 0.31-2.29  | 0        | 0.29-0.49  | 2.14-2.31   | G            |
| $\alpha$ 1-globulin             | g/L               | 44  | 3.2   | 0.9   | 3.1    | 1.8  | 5.5   | 1.8-5.4    | 1S       | 1.8-2.0    | 5.1-5.5     | NG           |
| $\alpha$ 2-globulin             | g/L               | 44  | 6.7   | 1.7   | 6.7    | 3.6  | 11.5  | 3.6-11.3   | 1S       | 3.6-4.6    | 9.2-11.5    | NG           |
| $\beta$ 1-globulin              | g/L               | 44  | 5.8   | 1.9   | 5.6    | 2.2  | 11.2  | 2.2-11.2   | 2S       | 2.2-2.9    | 8.9-11.2    | NG           |
| $\beta$ 2-globulin              | g/L               | 44  | 6.7   | 2.2   | 6.3    | 3.4  | 11.6  | 3.4-11.5   | 0        | 3.4-3.8    | 10.4-11.6   | NG           |
| $\gamma$ -globulin              | g/L               | 44  | 10.9  | 5.1   | 10.0   | 3.9  | 23.9  | 4.0-23.5   | 0        | 3.9-4.6    | 19.1-23.9   | NG           |

SPE = serum protein electrophoresis; A/G: albumin:globulin ratio; dROMs: derivatives of reactive oxygen metabolites; S: suspected outliers; R: removed outliers; G: Gaussian distribution of data; NG: non-gaussian distribution of data.

**Table S5:** Descriptive statistics of hematological reference intervals (RIs) for cows at  $30 \pm 3$  DIM. Number of observations, mean, standard deviation, median, minimum, maximum, RI, number of outliers, confidence intervals (CI) of the lower (LRL) and upper reference limits (URL) and distribution of data. All RIs were generated according to a nonparametric method.

| Analyte      | Units       | n   | Mean  | SD   | Median | Min  | Max   | RI         | Outliers | LRL 90% CI | URL 90% CI | Distribution |
|--------------|-------------|-----|-------|------|--------|------|-------|------------|----------|------------|------------|--------------|
| Erythrocytes | $10^{12}/L$ | 121 | 6.1   | 0.8  | 6.1    | 3.6  | 9.0   | 4.1-7.8    | 3S       | 3.7-4.8    | 7.5-9.0    | G            |
| Hemoglobin   | g/L         | 121 | 103.5 | 11.5 | 103.0  | 69.0 | 131.0 | 75.2-127.9 | 1S       | 69.0-83.0  | 120-131    | G            |
| Hematocrit   | L/L         | 121 | 0.28  | 0.03 | 0.28   | 0.14 | 0.36  | 0.20-0.34  | 2S       | 0.14-0.22  | 0.32-0.36  | G            |
| MCV          | $\mu m^3$   | 121 | 45.7  | 3.1  | 45.3   | 37.9 | 54.2  | 38.9-53.1  | 2S       | 37.9-41.3  | 51.5-54.2  | NG           |
| MCH          | pg/cell     | 120 | 17.0  | 1.1  | 16.9   | 14.1 | 19.7  | 15.0-19.1  | 1R       | 14.1-15.2  | 18.9-19.7  | G            |
| MCHC         | g/L         | 120 | 35.7  | 1.0  | 35.7   | 32.8 | 38.8  | 33.5-37.9  | 4S,1R    | 32.8-34.1  | 37.2-38.8  | G            |
| RDW          | %           | 120 | 16.8  | 1.0  | 16.7   | 12.8 | 19.4  | 14.4-19.0  | 4S,1R    | 12.8-15.2  | 18.6-19.4  | NG           |
| Leukocytes   | $10^9/L$    | 121 | 9.3   | 2.1  | 9.1    | 4.2  | 17.0  | 5.4-14.0   | 2S       | 4.2-6.7    | 13.2-17.0  | NG           |
| Neutrophils  | $10^9/L$    | 120 | 4.5   | 1.7  | 4.3    | 1.0  | 9.5   | 1.5-9.0    | 4S,1R    | 1.0-2.2    | 7.6-9.5    | NG           |
| Lymphocytes  | $10^9/L$    | 120 | 4.1   | 1.4  | 4.1    | 1.4  | 9.8   | 1.6-7.7    | 2S,1R    | 1.4-1.9    | 6.4-9.8    | NG           |
| Monocyte     | $10^9/L$    | 120 | 0.4   | 0.3  | 0.3    | 0.0  | 1.3   | 0.0-1.1    | 1R       | 0.0-0.0    | 1.0-1.3    | NG           |
| Eosinophils  | $10^9/L$    | 119 | 0.2   | 0.3  | 0.2    | 0.0  | 1.4   | 0.0-1.3    | 4S,2R    | 0.0-0.0    | 0.9-1.4    | NG           |
| Platelets    | $10^9/L$    | 121 | 474   | 127  | 441    | 195  | 908   | 285-752    | 2S       | 195-319    | 692-908    | NG           |

MCV: mean corpuscular volume; MCH: mean cellular hemoglobin; MCHC: mean corpuscular hemoglobin concentration; RDW: red cell distribution width; S: suspected outliers; R: removed outliers; G: Gaussian distribution of data; NG: non-gaussian distribution of data.

**Table S6:** Descriptive statistics of biochemical reference intervals (RIs) for cows at  $30 \pm 3$  DIM. Number of observations, mean, standard deviation, median, minimum, maximum, RI, number of outliers, confidence intervals (CI) of the lower (LRL) and upper reference limits (URL) and distribution of data. All RIs were generated according to a nonparametric method.

| Analyte                  | Units       | n   | Mean  | SD   | Median | Min   | Max   | RI          | Outliers | LRL         | 90% CI | URL         | 90% CI | Distribution |
|--------------------------|-------------|-----|-------|------|--------|-------|-------|-------------|----------|-------------|--------|-------------|--------|--------------|
| A/G-COL                  | ratio       | 129 | 0.89  | 0.24 | 0.85   | 0.37  | 1.6   | 0.46-1.52   | 11S, 1R  | 0.37-0.57   |        | 1.42-1.60   |        | NG           |
| Albumin-COL              | g/L         | 130 | 36.1  | 2.7  | 36.6   | 27.1  | 41.3  | 29-40.9     | 3S       | 27.1-31.3   |        | 39.5-41.3   |        | NG           |
| ALP                      | U/L         | 129 | 52    | 24   | 48     | 13    | 144   | 16-132      | 5S, 2R   | 13-22       |        | 95-144      |        | NG           |
| AST                      | U/L         | 129 | 74.4  | 14.5 | 73.0   | 35.0  | 130.0 | 52.3-111.8  | 5S, 2R   | 35-56       |        | 102-130     |        | NG           |
| $\beta$ -hydroxybutyrate | mmol/L      | 126 | 0.54  | 0.22 | 0.49   | 0.21  | 1.31  | 0.26-1.12   | 8S, 5R   | 0.21-0.30   |        | 1.02-1.31   |        | NG           |
| Calcium                  | mmol/L      | 130 | 2.26  | 0.18 | 2.27   | 1.60  | 2.79  | 1.92-2.70   | 4S, 1R   | 1.60-1.97   |        | 2.59-2.79   |        | NG           |
| Chloride                 | mmol/L      | 129 | 93    | 5    | 93     | 74    | 103   | 81-103      | 3S, 2R   | 74-84       |        | 100-103     |        | NG           |
| Cholesterol              | mmol/L      | 131 | 4.47  | 1.01 | 4.31   | 2.12  | 7.83  | 2.67-6.90   | 2S       | 2.12-3.14   |        | 6.31-7.83   |        | NG           |
| Creatinine               | $\mu$ mol/L | 129 | 83.7  | 11.1 | 79.6   | 61.9  | 114.9 | 61.9-106.1  | 13S, 2R  | 61.9-70.7   |        | 106.1-114.9 |        | NG           |
| Fructosamine             | $\mu$ mol/L | 131 | 168   | 24   | 172    | 97    | 220   | 113-210     | 2S       | 97-126      |        | 201-220     |        | NG           |
| GGT                      | U/L         | 126 | 26.4  | 8.0  | 25.0   | 10.0  | 54    | 13.2-48.0   | 7S, 5R   | 10.0-16.0   |        | 44-54       |        | NG           |
| Globulin-COL             | g/L         | 129 | 42.7  | 9.5  | 42.7   | 21.1  | 72.9  | 24.8-62.7   | 1S       | 21.1-26.1   |        | 58.6-72.9   |        | G            |
| Glucose                  | mmol/L      | 127 | 4.00  | 0.40 | 4.00   | 2.83  | 5.30  | 3.18-4.90   | 4S, 4R   | 2.83-3.38   |        | 4.57-5.30   |        | NG           |
| Magnesium                | mmol/L      | 130 | 1.01  | 0.17 | 1.03   | 0.70  | 1.60  | 0.71-1.35   | 1S, 1R   | 0.70-0.74   |        | 1.32-1.60   |        | NG           |
| NEFA                     | mmol/L      | 131 | 0.33  | 0.20 | 0.30   | 0.07  | 1.07  | 0.09-0.89   | 5S       | 0.07-0.11   |        | 0.72-1.07   |        | NG           |
| Phosphorous              | mmol/L      | 130 | 1.57  | 0.31 | 1.55   | 0.77  | 2.65  | 0.98-2.29   | 2S, 1R   | 0.77-1.00   |        | 2.13-2.65   |        | NG           |
| Potassium                | mmol/L      | 130 | 3.7   | 0.6  | 3.7    | 2.4   | 5.4   | 2.5-5.0     | 5S, 1R   | 2.4-2.9     |        | 4.7-5.4     |        | NG           |
| Sodium                   | mmol/L      | 127 | 135.2 | 4.5  | 136.0  | 122.0 | 144.0 | 123.2-143.0 | 4S, 4R   | 122.0-126.0 |        | 142-146     |        | NG           |
| Total bilirubin          | $\mu$ mol/L | 131 | 2.37  | 1.40 | 1.97   | 0.35  | 7.64  | 0.51-6.10   | 6S       | 0.35-0.66   |        | 5.29-7.64   |        | NG           |
| Total protein            | g/L         | 130 | 78.9  | 9.0  | 80.0   | 58.0  | 100.0 | 59.8-95.7   | 1R       | 58.0-63.0   |        | 93-100      |        | NG           |
| Urea                     | mmol/L      | 130 | 4.33  | 1.16 | 4.33   | 1.83  | 7.33  | 2.21-6.95   | 1S, 1R   | 1.83-2.50   |        | 6.66-7.33   |        | G            |
| Zinc                     | $\mu$ mol/L | 127 | 11.88 | 3.56 | 11.47  | 3.67  | 20.96 | 5.35-19.12  | 2R       | 3.67-5.97   |        | 18.05-20.96 |        | G            |

A/G: albumin:globulin ratio; COL: colorimetric method; ALP: alkaline phosphatase; AST: aspartate aminotransferase; GGT:  $\gamma$ -glutamyl transferase; NEFA: non-esterified fatty acid; S: suspected outliers; R: removed outliers; G: Gaussian distribution of data; NG: non-gaussian distribution of data.

**Table S7:** Descriptive statistics of reference intervals (RIs) for some markers of inflammation/oxidation and for serum protein electrophoresis for cows at  $30 \pm 3$  DIM. Number of observations, mean, standard deviation, median, minimum, maximum, RI, number of outliers, confidence intervals (CI) of the lower (LRL) and upper reference limits (URL) and distribution of data. All RIs were generated according to a nonparametric method.

| Analyte                          | Units             | n   | Mean  | SD    | Median | Min  | Max   | RI         | Outliers | LRL 90% CI | URL 90% CI  | Distribution |
|----------------------------------|-------------------|-----|-------|-------|--------|------|-------|------------|----------|------------|-------------|--------------|
| $\beta$ -carotene                | $\mu\text{mol/L}$ | 131 | 24.22 | 11.18 | 22.36  | 1.86 | 61.48 | 9.32-50.30 | 2S       | 1.86-11.18 | 42.85-61.48 | NG           |
| Ceruloplasmin                    | $\mu\text{mol/L}$ | 131 | 3.01  | 0.80  | 3.01   | 1.10 | 5.71  | 1.35-5.23  | 8S       | 1.10-1.71  | 4.47-5.71   | NG           |
| dROMs ( $\text{H}_2\text{O}_2$ ) | mg/dL             | 131 | 13.2  | 3.4   | 13.1   | 4.4  | 24.7  | 7.0-21.5   | 1S       | 4.4-8.3    | 19.3-24.7   | NG           |
| Haptoglobin                      | $\mu\text{mol/L}$ | 119 | 1.4   | 1.1   | 1.2    | 0.1  | 5.5   | 0.1-4.4    | 6S, 12R  | 0.1-0.2    | 3.8-5.5     | NG           |
| Myeloperoxidase                  | U/L               | 130 | 461   | 70    | 462    | 294  | 689   | 310-634    | 8S, 1R   | 294-341    | 584-689     | NG           |
| Paraoxonase-1                    | U/L               | 131 | 110.7 | 27.3  | 110.7  | 54.7 | 204.5 | 63.2-183.9 | 4S       | 54.8-69.9  | 164.5-204.5 | NG           |
| Thiol groups                     | $\mu\text{mol/L}$ | 131 | 356   | 60    | 357    | 218  | 555   | 240-517    | 3S       | 218-270    | 445-555     | G            |
| Vitamin A                        | $\mu\text{mol/L}$ | 131 | 2.07  | 0.52  | 2.12   | 0.52 | 2.21  | 0.80-3.05  | 3S       | 0.51-1.25  | 2.84-3.28   | G            |
| Vitamin E                        | $\mu\text{mol/L}$ | 131 | 7.08  | 2.83  | 6.76   | 0.42 | 15.91 | 2.37-13.61 | 2S       | 0.42-3.13  | 12.72-15.91 | G            |
| Albumin-SPE                      | g/L               | 47  | 40.2  | 10.1  | 40.4   | 13.7 | 62.4  | 14.1-61.7  | 0        | 13.7-25.3  | 53.7-72.4   | G            |
| Globulin-SPE                     | g/L               | 47  | 39.7  | 13.5  | 37.6   | 20.6 | 76.3  | 20.6-75.7  | 0        | 20.6-25.7  | 57.1-76.3   | G            |
| A/G-SPE                          | ratio             | 47  | 1.18  | 0.56  | 1.14   | 0.18 | 2.30  | 0.19-2.26  | 0        | 0.18-0.48  | 2.04-2.30   | G            |
| $\alpha$ 1-globulin              | g/L               | 47  | 3.3   | 1.0   | 3.1    | 1.7  | 5.8   | 1.7-5.7    | 1S       | 1.7-2.1    | 5.4-5.8     | NG           |
| $\alpha$ 2-globulin              | g/L               | 47  | 7.4   | 1.5   | 7.5    | 3.8  | 10.3  | 3.9-10.2   | 0        | 3.8-4.9    | 9.7-10.3    | G            |
| $\beta$ 1-globulin               | g/L               | 47  | 5.7   | 1.6   | 5.5    | 3.1  | 10.2  | 3.1-9.9    | 0        | 3.1-3.6    | 8.2-10.2    | G            |
| $\beta$ 2-globulin               | g/L               | 47  | 9.9   | 4.3   | 9.0    | 2.5  | 21.5  | 3.0-21.0   | 0        | 2.5-5.4    | 18.2-21.5   | NG           |
| $\gamma$ -globulin               | g/L               | 47  | 13.5  | 6.7   | 11.3   | 5.4  | 34.8  | 5.6-34.6   | 2S       | 5.4-6.5    | 25.0-34.8   | NG           |

SPE = serum protein electrophoresis; A/G: albumin:globulin ratio; dROMs: derivates of reactive oxygen metabolites; S: suspected outliers; R: removed outliers; G: Gaussian distribution of data; NG: non-gaussian distribution of data.
